# Supplementary material for: Bacterial periplasmic nitrate and trimethylamine-N-oxide respiration coupled to menaquinol-cytochrome c reductase (Qcr): Implications for electrogenic reduction of alternative electron acceptors
Source: PubMed Central journal article supplement (PMC6195509; doi:10.1038/s41598-018-33857-2), 2018-10-19
Supplement: 41598_2018_33857_MOESM1_ESM.pdf [file 41598_2018_33857_MOESM1_ESM.pdf]

## **SUPPLEMENTARY INFORMATION**

Bacterial periplasmic nitrate and trimethylamine-N-oxide respiration coupled to menaquinol-cytochrome *c* reductase (Qcr): Implications for electrogenic reduction of alternative electron acceptors

Nitanshu Garg, Aidan J. Taylor and David J. Kelly\*

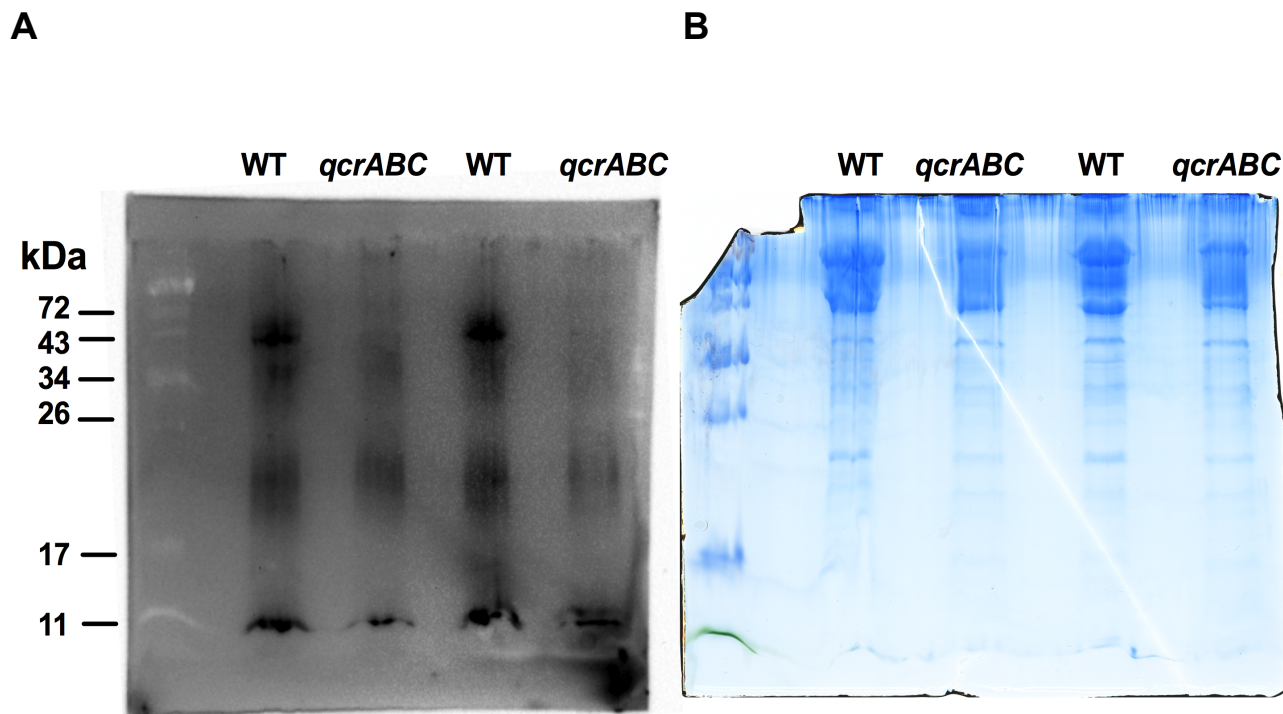

**Supplementary Figure 1.** Haem blot of *C. jejuni* wild-type and *qcrABC* mutant strains. (A) Full size, uncropped haem blot that Fig. 1C is derived from. (B) Coomassie blue stained SDS-PAGE gel of the same samples. Total membranes were prepared as described in Experimental Procedures and denatured gently by incubation at 37 °C for 1 h in Laemmli sample buffer without mercaptoethanol. 20 µg total protein was run per lane on two identical gels. One gel was electroblotted onto nitrocellulose membrane and stained for haem by enhanced chemiluminescence (Panel A). The Image was obtained using a ChemiDoc XRS system (BioRad Inc) with an exposure time of 2 min. The other gel was stained to show similar total protein loading in each lane (panel B). Panel (A) shows that a prominent haem stained band of ~ 42 kDa, the predicted size of QcrC, is missing in the *qcrABC* mutant.

```

1
TorC MRKLWNALRRPSARWSVLALVAIGIVIGIALIVLPHVGIKVTSTTEFH1CVS
Cj0265 .....
Consensus .....

51
TorC CHSMQPVYEEYKQSVHFQNASGVRAECHDCHIPPDIPGMVVKRKLASNDI H2 100
Cj0265 .....
Consensus .....

101
TorC YQTFIAHSIDTPEKFEAKRAELAEREWARMKENNSATCRSCHNYDAMDHA H3 150
Cj0265 .....
Consensus .....

151
TorC KQHPEAARQMKVAAKDNQSCIDCHKGIAHQLPDMSSGFRKQFDELRASAN H4 200
Cj0265 .....MKKIFISFV..VLATCL
Consensus .....MkkgFrkqf..lrAsan

201
TorC DSGDTLYSIDIKPIYAAKGDKEASGSLLPASEVKVLKRDGDWLQIEITGW 250
Cj0265 WAKNTAYTDEVVSLYLNKDDTKVIGRLLPTNPFVLKSENNRVLLKIDGY
Consensus dag#TaYsd#!kpiYaaKdDkeaiGrLLPanefeVLKr#n#rlqieIdGw

251
TorC TESAGRQRVLTQFPGKRIFVASIRGDVQQVKTLEKTTVADTNTEWSKLQ 300
Cj0265 VNPKAPS.VIYFNDSQRIIVAAF....SKNTKLNFSQRITGKNGKWDKVS
Consensus t#paarq.VitqndgqRIiVAai....qq#tKlnekqr!adkNgeWdKlq

301
TorC ATAWMKKGMVNDIKPIWAYADSLYNGTCNQCHGAPEIAHFDANGWIGTL H5 350
Cj0265 LEIWADKKEFVKDNKEMLNRAKELFVNNCGICHAIHKEKEFTANAWPAIF
Consensus aeaWadKg#mVnDnKeilarAdeL%nnnCnqCHaaheaeFdANaWiail

351
TorC NGMIGFTSLDKREERTLLKYLQMNASDTAGKAHGDKKEEK 390
Cj0265 RSMADRTGIDKKDRWLVIEYLQNAKDFKTK.....
Consensus rgMadrTgiDKr#rrllieYLQkNAkDfagK.....

```

**Supplementary Figure 2.** Sequence alignment between TorC from *E. coli* K12 and Cj0265 (TorB) from *C. jejuni* NCTC 11168; H1-H5 (red) are the CXXCH C-haem ligation sites and the black boxed area in the N-terminal region of TorC shows the approximate position of the single transmembrane alpha-helix forming a membrane anchor. The C-terminal part of TorC containing the fifth C-haem ligation site is homologous over the entire length of Cj0265 and the single C-haem ligation site in Cj0265 is in the same relative position. Alignment was performed using MULTALIN with default parameters.
